# Supplementary material for: Evolution of mammalian longevity: age-related increase in autophagy in bats compared to other mammals
Source: PubMed Central journal article supplement (PMC8034928; doi:10.18632/aging.202852), 2021-03-21
Supplement: aging-13-202852-s007.pdf [file aging-13-202852-s007.pdf]

**Supplementary Table 5. Functional enrichment in KEGG pathways of the STRING protein-protein interaction network including genes under selective pressure in bat lineages, genes showing bat-specific upregulation with age, and LC3.**

| <b>Pathway ID</b> | <b>Pathway description</b>           | <b>Observed gene count</b> | <b>FDR</b> | <b>Matching protein in the network</b>   |
|-------------------|--------------------------------------|----------------------------|------------|------------------------------------------|
| 5169              | Epstein-Barr virus infection         | 6                          | 0.000128   | Csnk2a1,Eif2ak4,Map3k7,Nedd4,Pik3ca,Tbk1 |
| 5162              | Measles                              | 5                          | 0.000257   | Csnk2a1,Eif2ak4,Map3k7,Pik3ca,Tbk1       |
| 4144              | Endocytosis                          | 5                          | 0.00138    | Nedd4,Sh3glb1,Vps36,Vps4a,Vta1           |
| 4140              | Regulation of autophagy              | 3                          | 0.00208    | Pik3c3,Pik3r4,Ulk2                       |
| 4152              | AMPK signaling pathway               | 4                          | 0.00211    | Map3k7,Mtor,Pik3ca,Sirt1                 |
| 4150              | mTOR signaling pathway               | 3                          | 0.00495    | Mtor,Pik3ca,Ulk2                         |
| 5168              | Herpes simplex infection             | 4                          | 0.00832    | Csnk2a1,Eif2ak4,Map3k7,Tbk1              |
| 4620              | Toll-like receptor signaling pathway | 3                          | 0.016      | Map3k7,Pik3ca,Tbk1                       |
| 4668              | TNF signaling pathway                | 3                          | 0.0178     | Dnm11,Map3k7,Pik3ca                      |
| 5160              | Hepatitis C                          | 3                          | 0.03       | Eif2ak4,Pik3ca,Tbk1                      |
| 5206              | MicroRNAs in cancer                  | 3                          | 0.0303     | Mtor,Rock1,Sirt1                         |
| 4145              | Phagosome                            | 3                          | 0.0424     | Atp6v1c1,Atp6v1h,Pik3c3                  |
| 5164              | Influenza A                          | 3                          | 0.0442     | Eif2ak4,Pik3ca,Tbk1                      |
| 4930              | Type II diabetes mellitus            | 2                          | 0.0498     | Mtor,Pik3ca                              |

**Supplementary Table 6. Genes enriched in the parental GO term 'autophagy' that showed correlation with age in M.**

| <b>Gene</b>     | <b>Bat</b> | <b>Human</b> | <b>Mouse</b> |
|-----------------|------------|--------------|--------------|
| <i>PIK3CA</i>   | 0.483      | -0.233       | -0.568       |
| <i>ROCK1</i>    | 0.468      | -0.091       | -0.41        |
| <i>RB1CC1</i>   | 0.446      | -0.143       | -0.164       |
| <i>ATP6V1E2</i> | 0.438      | -0.469       | NA           |
| <i>RAB12</i>    | 0.423      | 0.075        | 0.254        |
| <i>CSNK2A1</i>  | 0.415      | -0.015       | -0.406       |
| <i>SCFD1</i>    | 0.385      | -0.235       | 0.027        |
| <i>NEDD4</i>    | 0.383      | -0.043       | -0.1         |
| <i>UVRAG</i>    | 0.36       | 0.156        | 0.087        |
| <i>POLR3A</i>   | 0.343      | 0.17         | -0.185       |
| <i>ATG3</i>     | 0.341      | -0.117       | 0.508        |
| <i>MTDH</i>     | 0.318      | -0.148       | 0.586        |
| <i>CISD2</i>    | 0.314      | 0.079        | 0.28         |
| <i>PIK3CB</i>   | 0.308      | -0.14        | 0.497        |
| <i>ATG4C</i>    | 0.296      | -0.281       | 0.656        |
| <i>PAFAH1B2</i> | 0.293      | -0.278       | -0.097       |
| <i>MAPK8</i>    | 0.286      | 0.099        | -0.187       |
| <i>USP33</i>    | 0.278      | -0.237       | -0.165       |
| <i>STAM</i>     | 0.276      | 0.029        | -0.213       |
| <i>FIS1</i>     | 0.275      | 0.111        | -0.032       |
| <i>MID2</i>     | 0.274      | 0.218        | 0.262        |
| <i>TRAPPC8</i>  | 0.274      | -0.167       | -0.066       |
| <i>ULK2</i>     | 0.271      | -0.017       | -0.312       |
| <i>FBXW7</i>    | 0.267      | 0.074        | 0.112        |
| <i>TOMM70</i>   | 0.267      | NA           | NA           |
| <i>SIRT1</i>    | 0.243      | -0.091       | -0.566       |
| <i>HERC1</i>    | 0.241      | 0.06         | 0.086        |
| <i>VPS26A</i>   | 0.24       | 0.046        | 0.367        |
| <i>PRKAB2</i>   | 0.234      | -0.157       | 0.551        |
| <i>STAM2</i>    | 0.226      | -0.299       | 0.334        |
| <i>SNX14</i>    | 0.214      | -0.27        | -0.158       |
| <i>EP300</i>    | 0.213      | -0.17        | 0.013        |
| <i>VTA1</i>     | 0.208      | -0.302       | -0.327       |
| <i>MAP3K7</i>   | 0.203      | -0.213       | -0.247       |
| <i>TBC1D5</i>   | 0.198      | -0.231       | 0.111        |
| <i>TBK1</i>     | 0.198      | -0.218       | -0.215       |
| <i>SNX5</i>     | 0.19       | 0.143        | -0.653       |
| <i>VPS36</i>    | 0.179      | -0.207       | -0.483       |
| <i>NRBF2</i>    | 0.177      | -0.236       | -0.361       |
| <i>WDFY3</i>    | 0.176      | -0.134       | 0.703        |
| <i>DNM1L</i>    | 0.168      | -0.081       | -0.245       |
| <i>VTG1A</i>    | 0.164      | 0.042        | 0.482        |
| <i>UBXN2B</i>   | 0.146      | -0.14        | -0.179       |
| <i>EIF2AK4</i>  | 0.141      | -0.069       | -0.361       |
| <i>WDR41</i>    | 0.138      | -0.121       | 0.275        |
| <i>RIPK2</i>    | 0.137      | 0.232        | -0.214       |

|                 |        |        |        |
|-----------------|--------|--------|--------|
| <i>SH3GLB1</i>  | 0.132  | -0.149 | -0.039 |
| <i>ATG4A</i>    | 0.121  | -0.063 | 0.094  |
| <i>PIK3R4</i>   | 0.11   | -0.227 | -0.457 |
| <i>ATG5</i>     | 0.108  | -0.082 | 0.227  |
| <i>IFT88</i>    | 0.104  | -0.124 | 0.268  |
| <i>VIPAS39</i>  | 0.103  | -0.202 | NA     |
| <i>ATP6V1H</i>  | 0.099  | -0.172 | -0.032 |
| <i>SPTLC1</i>   | 0.093  | -0.2   | 0.072  |
| <i>PIK3C3</i>   | 0.077  | -0.268 | -0.269 |
| <i>ATG10</i>    | 0.076  | -0.105 | 0.147  |
| <i>PTK2</i>     | 0.061  | 0.109  | 0.484  |
| <i>RAB3GAP1</i> | 0.053  | -0.013 | -0.567 |
| <i>AMBRA1</i>   | 0.052  | 0.153  | -0.323 |
| <i>EPM2A</i>    | 0.048  | 0.025  | 0.268  |
| <i>ANXA7</i>    | 0.046  | -0.2   | 0.383  |
| <i>ATP6VIC1</i> | 0.03   | -0.186 | -0.09  |
| <i>U2AF1</i>    | 0.03   | -0.053 | -0.207 |
| <i>ATP6V0A1</i> | 0.021  | 0.015  | 0.181  |
| <i>RHEB</i>     | -0.006 | -0.018 | 0.356  |
| <i>VPS4B</i>    | -0.023 | -0.248 | 0.202  |
| <i>ACTL6A</i>   | -0.066 | -0.327 | -0.318 |
| <i>SREBF2</i>   | -0.074 | -0.037 | -0.03  |
| <i>TPCN1</i>    | -0.08  | -0.151 | 0.112  |
| <i>MTMR3</i>    | -0.084 | -0.012 | 0.067  |

myotis bats. The Spearman's rank correlation coefficients between their expression and age in bat, human and mouse were extracted from Huang et al. (2019). NA – transcript not detected in the blood transcriptome.

**Supplementary Table 7. Taxonomic information: List of species included in the study, their record lifespan from AnAge, source of the samples, age ranges of individuals included in the study and sampling permit details.**

| Species                              | Max. lifespan | Source                                                                                                                                                                               | Sample                                                                                | Age range       | Permit details for sampling wild bat populations                                                                                                                                                      |
|--------------------------------------|---------------|--------------------------------------------------------------------------------------------------------------------------------------------------------------------------------------|---------------------------------------------------------------------------------------|-----------------|-------------------------------------------------------------------------------------------------------------------------------------------------------------------------------------------------------|
| <i>M. myotis</i>                     | 37.1yrs       | Wild population, Brittany, France                                                                                                                                                    | wing punches                                                                          | 0 - 7+yrs       | Arrêté préfectoral (18/07/2013 and 05/08/2013) issued to Eric Petit, Frédéric Touzalin and Sébastien Puechmaille by Préfet du Morbihan, valid between 15th June - 15th September; 2013-2017 inclusive |
| <i>P. kuhlii</i>                     | 8yrs          | Wild population, Krašnja, Slovenia                                                                                                                                                   | wing punches                                                                          | 0 – 7+ yrs      | Aut. Prot. N°: 13040, issued to Roberto Toffoli and Andrea Locatelli by the Italian ministry for the territory and sea safeguard (Ministero della tutela del territorio e del mare)                   |
|                                      |               | Wild population, Piemonte, Italy                                                                                                                                                     |                                                                                       |                 | Aut N°: 35601-35/2010-6, issued to Primož Presetnik by the Slovenian Environment Agency (Agencija Republike Slovenije za okolje)                                                                      |
| <i>M. musculus</i> (C57BL/6J strain) | 4 yrs         | Conboy laboratory (Department of Bioengineering, Berkeley Research, University of California) and O'Neill laboratory (School of Biochemistry and Immunology, Trinity College Dublin) | ear clippings                                                                         | 2 – 22 months   | not applicable                                                                                                                                                                                        |
| <i>M. musculus</i> (NHEJ background) | na            | Gorbanova laboratory (Departments of Biology and Medicine, University of Rochester, Rochester, NY 14627, USA)                                                                        | flank-skin derived primary fibroblasts developed as described in Vaidya et al. (2014) | 3 and 28 months | not applicable                                                                                                                                                                                        |
