# Supplementary material for: Evolution of mammalian longevity: age-related increase in autophagy in bats compared to other mammals
Source: PubMed Central journal article supplement (PMC8034928; doi:10.18632/aging.202852), 2021-03-21
Supplement: aging-13-202852-s011.pdf [file aging-13-202852-s011.pdf]

**Supplementary Table 11. Additional gene data.**

| <b>Mammalian genome</b>          | <b>Number of genes</b> | <b>Order</b> | <b>Reference used</b>        |
|----------------------------------|------------------------|--------------|------------------------------|
| <i>Rhinolophus ferrumequinum</i> | 160                    | Chiroptera   | <i>Rhinolophus sinicus</i>   |
| <i>Megaderma lyra</i>            | 100                    | Chiroptera   | <i>Rhinolophus sinicus</i>   |
| <i>Eidolon helvum</i>            | 174                    | Chiroptera   | <i>Myotis lucifugus</i>      |
| <i>Pteronotus parnellii</i>      | 108                    | Chiroptera   | <i>Myotis lucifugus</i>      |
| <i>Myotis myotis</i>             | 254                    | Chiroptera   | <i>Myotis lucifugus</i>      |
| <i>Choloepus hoffmanni</i>       | 168                    | Xenarthra    | <i>Dasyopus novemcinctus</i> |
| <i>Procavia capensis</i>         | 185                    | Afrotheria   | <i>Loxodonta africana</i>    |
| <i>Manis pentadactyla</i>        | 87                     | Pholidota    | <i>Manis javanica</i>        |

A number of additional genomes were mined for autophagy-related genes. These data were included in a separate data set. The reference genome used to annotate each target mammal is displayed.
