# Supplementary material for: Evolution of mammalian longevity: age-related increase in autophagy in bats compared to other mammals
Source: publisher site journal article supplement (doi:10.18632/aging.202852), 2021-03-21
Supplement: Supplementary file [file aging-v13i6-202852-supplementary-material-SD2.pdf]

## SUPPLEMENTARY FIGURES

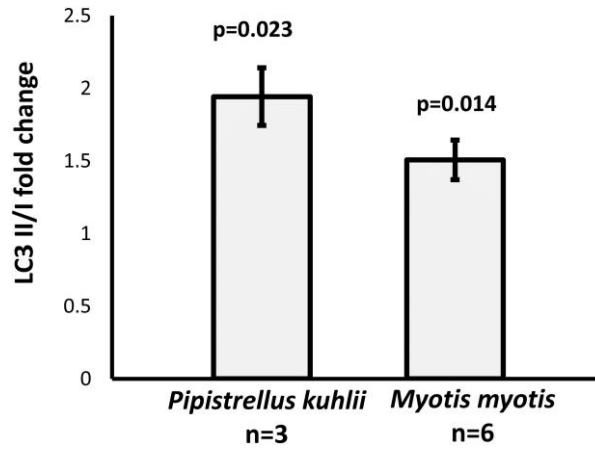

**Supplementary Figure 1. Rapamycin-induced change in LC3 II/I ratio in skin-derived fibroblasts from *P. kuhliii* and *M. myotis*.** Data represent mean fold change of LC3 II/I ratio induced by 5 $\mu$ M rapamycin treatment  $\pm$ SEM (p-values: two-tailed t-test). Individuals tested were 0-3 years old (*P. kuhliii*) and 0-2 years old (*M. myotis*).

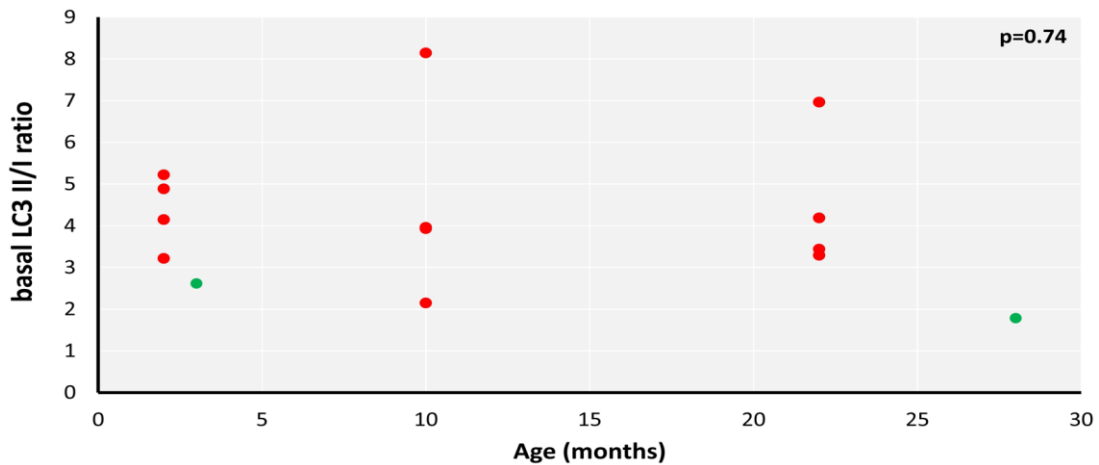

**Supplementary Figure 2. Basal LC3 II/I ratio does not increase with age in mouse.** In addition to mouse fibroblasts isolated from mouse ear (n=14, red dots), we included the flank skin derived fibroblasts from homozygous NHEJ mouse generated by Vaidya et al., (2014) (n=2, green dots). The LC3II/I ratio was determined as described in experimental procedures and p-value in the top right-hand corner of the plot indicate the significance of linear model.

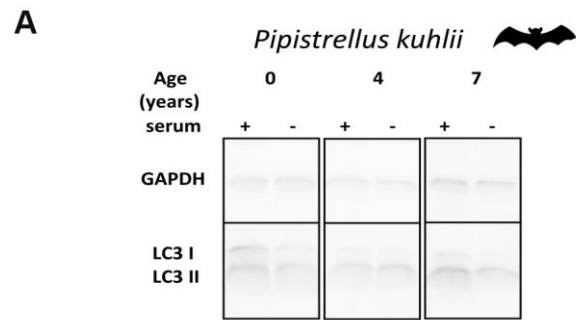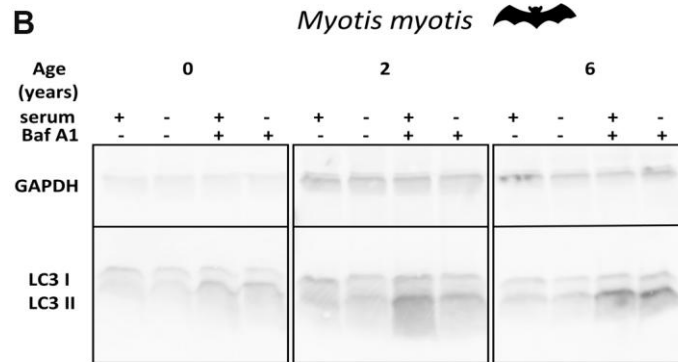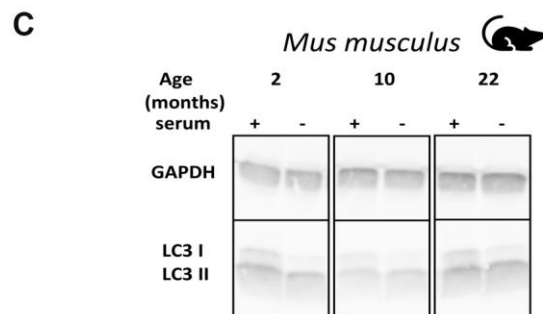

Supplementary Figure 3. Representative Western blot gels for GAPDH and LC3II/LC3I per each species. (A) *P. kuhlii*, (B) *M. myotis* and (C) *M. musculus*.

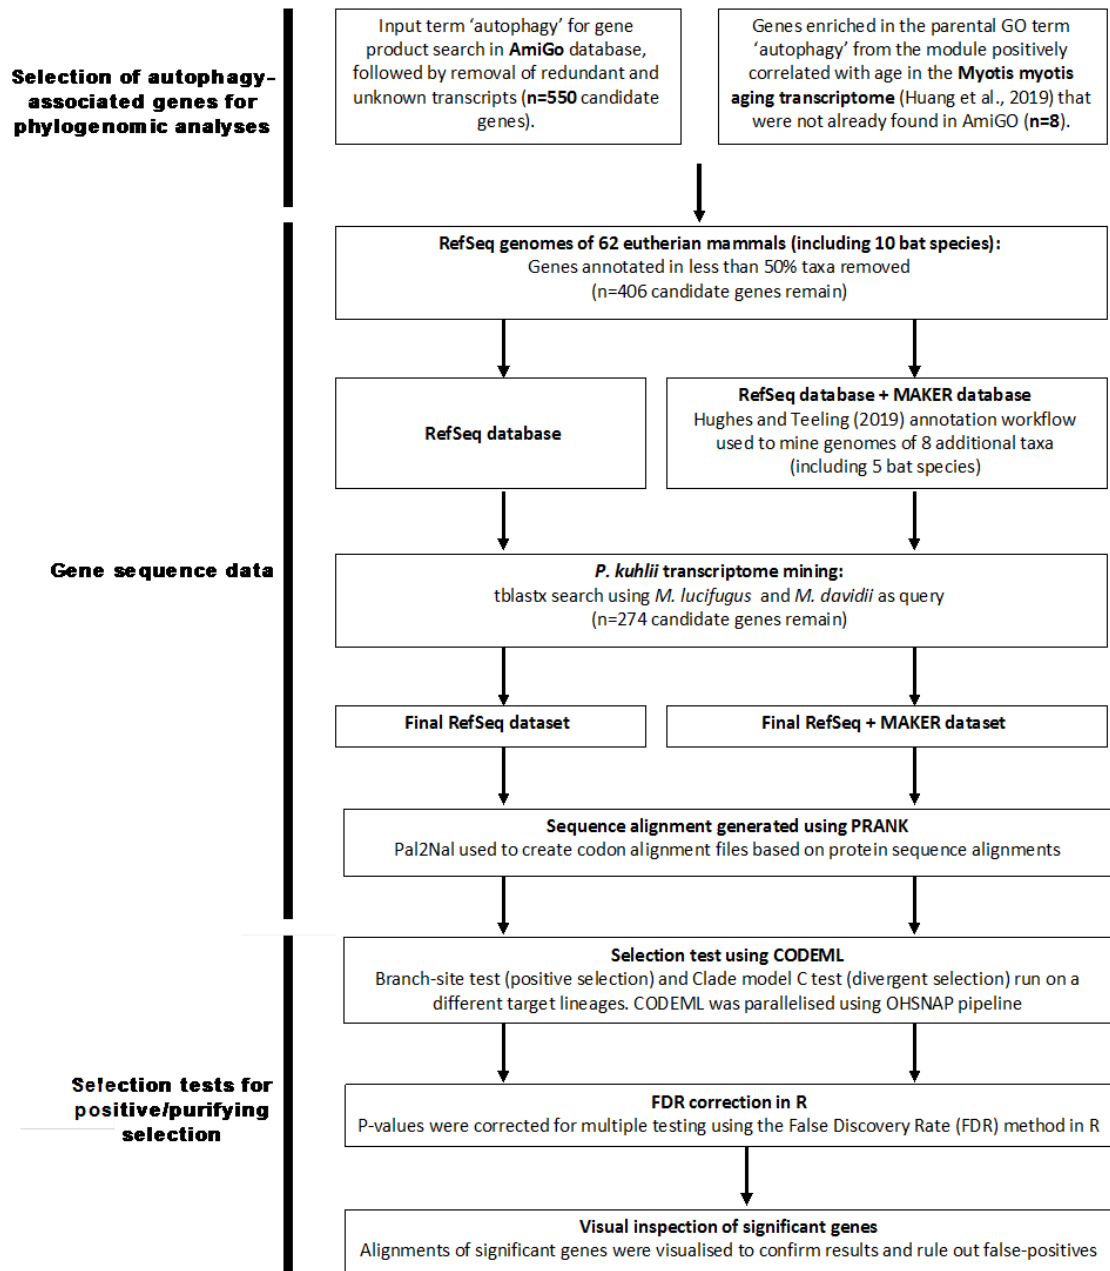

Supplementary Figure 4. Roadmap for phylogenomic analyses performed on autophagy-associated genes across eutherian mammals.

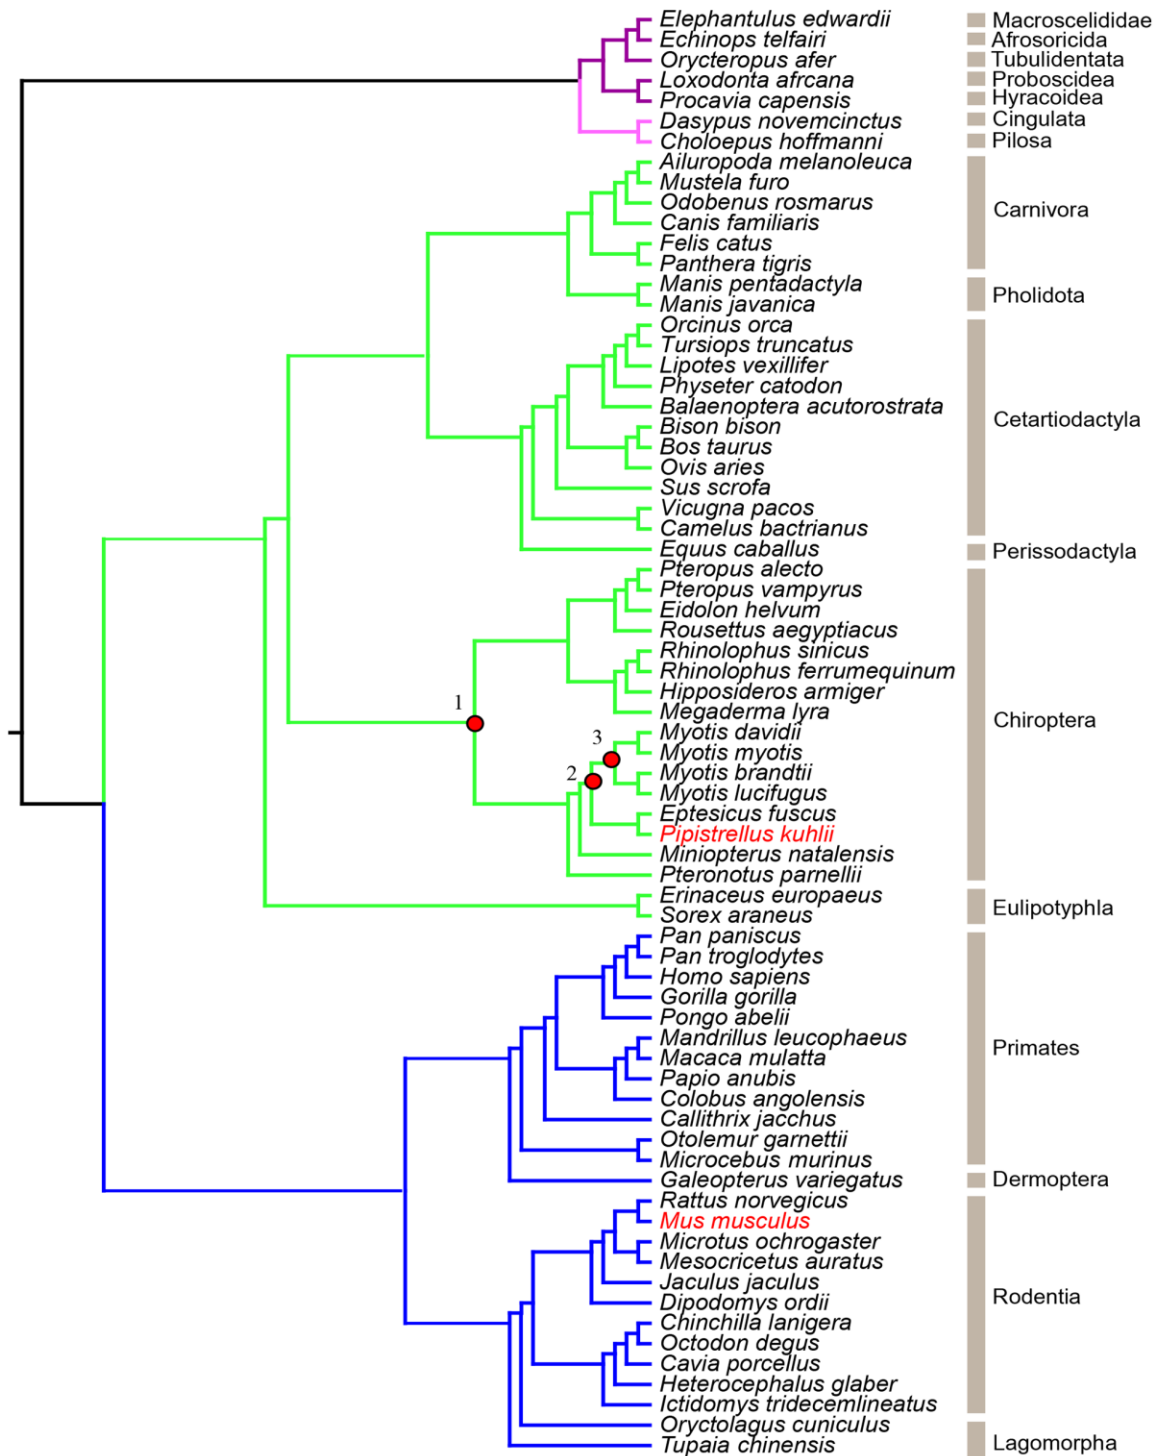

**Supplementary Figure 5. Mammalian species tree.** Patterns of selection were investigated for in a number of different ancestral bat branches (ancestral bat, ancestral Vespertilionidae and ancestral Myotis branches, labelled node 1, 2 and 3, respectively) and individual lineages (*P. kuhlii*, *M. musculus* and *M. myotis*, highlighted in red). This was done using autophagy-related gene sequences mined from mammalian genomes across all eutherian orders.
