# Supplementary material for: Evolution of mammalian longevity: age-related increase in autophagy in bats compared to other mammals
Source: publisher site journal article supplement (doi:10.18632/aging.202852), 2021-03-21
Supplement: Supplementary file [file aging-v13i6-202852-supplementary-material-SD9.pdf]

**Supplementary Table 9. RefSeq mammals used.**

| <b>Mammalian genome</b>           | <b>Number of genes</b> | <b>Order</b>    |
|-----------------------------------|------------------------|-----------------|
| <i>Loxodonta africana</i>         | 244                    | Afrotheria      |
| <i>Elephantulus edwardii</i>      | 232                    | Afrotheria      |
| <i>Echinops telfairi</i>          | 254                    | Afrotheria      |
| <i>Orycteropus afer</i>           | 262                    | Afrotheria      |
| <i>Dasyopus novemcinctus</i>      | 241                    | Xenarthra       |
| <i>Lipotes vexillifer</i>         | 249                    | Cetartiodactyla |
| <i>Orcinus orca</i>               | 261                    | Cetartiodactyla |
| <i>Tursiops truncatus</i>         | 168                    | Cetartiodactyla |
| <i>Physeter catodon</i>           | 156                    | Cetartiodactyla |
| <i>Balaenoptera acutorostrata</i> | 240                    | Cetartiodactyla |
| <i>Bison bison</i>                | 254                    | Cetartiodactyla |
| <i>Bos Taurus</i>                 | 261                    | Cetartiodactyla |
| <i>Ovis aries</i>                 | 213                    | Cetartiodactyla |
| <i>Sus scrofa</i>                 | 228                    | Cetartiodactyla |
| <i>Camelus bactrianus</i>         | 252                    | Cetartiodactyla |
| <i>Vicugna pacos</i>              | 248                    | Cetartiodactyla |
| <i>Equus caballus</i>             | 249                    | Perissodactyla  |
| <i>Manis javanica</i>             | 248                    | Pholidota       |
| <i>Felis catus</i>                | 263                    | Carnivora       |
| <i>Panthera tigris</i>            | 238                    | Carnivora       |
| <i>Ailuropoda melanoleuca</i>     | 255                    | Carnivora       |
| <i>Mustela putorius</i>           | 61                     | Carnivora       |
| <i>Odobenus rosmarus</i>          | 247                    | Carnivora       |
| <i>Canis lupus</i>                | 134                    | Carnivora       |
| <i>Pteropus alecto</i>            | 250                    | Chiroptera      |
| <i>Pteropus vampyrus</i>          | 258                    | Chiroptera      |
| <i>Rousettus aegyptiacus</i>      | 250                    | Chiroptera      |
| <i>Rhinolophus sinicus</i>        | 263                    | Chiroptera      |
| <i>Hipposideros armiger</i>       | 240                    | Chiroptera      |
| <i>Miniopterus natalensis</i>     | 256                    | Chiroptera      |
| <i>Eptesicus fuscus</i>           | 261                    | Chiroptera      |
| <i>Myotis brandtii</i>            | 257                    | Chiroptera      |
| <i>Myotis lucifugus</i>           | 244                    | Chiroptera      |
| <i>Myotis davidii</i>             | 254                    | Chiroptera      |
| <i>Erinaceus europaeus</i>        | 252                    | Eulipotyphla    |
| <i>Sorex araneus</i>              | 121                    | Eulipotyphla    |
| <i>Galeopterus variegatus</i>     | 69                     | Dermoptera      |
| <i>Otolemur garnettii</i>         | 260                    | Primates        |
| <i>Microcebus murinus</i>         | 249                    | Primates        |
| <i>Callithrix jacchus</i>         | 235                    | Primates        |
| <i>Colobus angolensis</i>         | 211                    | Primates        |
| <i>Papio anubis</i>               | 171                    | Primates        |
| <i>Mandrillus leucophaeus</i>     | 236                    | Primates        |

|                                   |     |            |
|-----------------------------------|-----|------------|
| <i>Macaca mulatta</i>             | 259 | Primates   |
| <i>Pongo abelii</i>               | 236 | Primates   |
| <i>Gorilla gorilla</i>            | 235 | Primates   |
| <i>Homo sapiens</i>               | 267 | Primates   |
| <i>Pan paniscus</i>               | 254 | Primates   |
| <i>Pan troglodytes</i>            | 246 | Primates   |
| <i>Tupaia chinensis</i>           | 247 | Scandentia |
| <i>Oryctolagus cuniculus</i>      | 237 | Lagomorpha |
| <i>Microtus ochrogaster</i>       | 260 | Rodentia   |
| <i>Mesocricetus auratus</i>       | 255 | Rodentia   |
| <i>Rattus norvegicus</i>          | 263 | Rodentia   |
| <i>Mus musculus</i>               | 264 | Rodentia   |
| <i>Jaculus jaculus</i>            | 261 | Rodentia   |
| <i>Dipodomys ordii</i>            | 264 | Rodentia   |
| <i>Ictidomys tridecemlineatus</i> | 262 | Rodentia   |
| <i>Chinchilla lanigera</i>        | 258 | Rodentia   |
| <i>Octodon degus</i>              | 137 | Rodentia   |
| <i>Cavia porcellus</i>            | 255 | Rodentia   |
| <i>Heterocephalus glaber</i>      | 253 | Rodentia   |

The mammals for which a RefSeq annotation was available, the number of autophagy-associated genes found and mammalian order is displayed.
